1 ***Helicobacter hepaticus* as disease driver in a novel CD40-mediated**  
2 **model of colitis**

3

4 Verena Friedrich<sup>1</sup>, Ignasi Forne<sup>2</sup>, Dana Matzek<sup>3</sup>, Diana Ring<sup>4</sup>, Bastian Popper<sup>3</sup>, Lara  
5 Jochum<sup>4</sup>, Stefanie Spriewald<sup>4</sup>, Tobias Straub<sup>5</sup>, Axel Imhof<sup>2</sup>, Anne Krug<sup>1</sup>, Bärbel  
6 Stecher<sup>4,6</sup>, Thomas Brocker<sup>1</sup>

7

8 <sup>1</sup> Institute for Immunology, BioMedical Center, Faculty of Medicine, LMU Munich,  
9 82152 Munich, Germany

10 <sup>2</sup> Zentrallabor für Proteinanalytik, BioMedical Center, Faculty of Medicine, LMU  
11 Munich, 82152 Munich, Germany

12 <sup>3</sup> Core facility Animal Models, BioMedical Center, Faculty of Medicine, LMU Munich,  
13 82152 Munich, Germany

14 <sup>4</sup> Max von Pettenkofer Institute of Hygiene and Medical Microbiology, German Center  
15 for Infection Research (DZIF), Partner Site Munich, LMU Munich, Munich 80336,  
16 Germany

17 <sup>5</sup> Core facility Bioinformatics, BioMedical Center, Faculty of Medicine, LMU Munich,  
18 82152 Munich, Germany

19 <sup>6</sup> German Center for Infection Research (DZIF), partner site Munich

20

21

22

23

24

25 correspondence to [tbrocker@med.uni-muenchen.de](mailto:tbrocker@med.uni-muenchen.de)

26

1 **ABSTRACT**

2 Gut microbiota and the immune system are in constant exchange, which shapes both,  
3 host immunity and microbial communities. Here, improper immune regulation can  
4 cause inflammatory bowel disease (IBD) and colitis. Antibody therapies blocking  
5 signaling through the CD40 – CD40L axis showed promising results as these  
6 molecules have been described to be deregulated in certain IBD patients. To better  
7 understand the mechanism, we used transgenic DC-LMP1/CD40 animals, which lack  
8 intestinal CD103<sup>+</sup> dendritic cells (DCs) and therefore cannot induce regulatory T (iTreg)  
9 cells due to a constitutive CD40-signal in CD11c<sup>+</sup> cells. These mice rapidly develop  
10 spontaneous fatal colitis with an increase of inflammatory IL-17<sup>+</sup>IFN- $\gamma$ <sup>+</sup> Th17/Th1 and  
11 IFN- $\gamma$ <sup>+</sup> Th1 cells. In the present study we analyzed the impact of the microbiota on  
12 disease development and detected elevated IgA- and IgG-levels in sera from DC-  
13 LMP1/CD40 animals. Their serum antibodies specifically bound intestinal bacteria and  
14 we identified a 60 kDa chaperonin GroEL (Hsp60) from *Helicobacter hepaticus* (*Hh*)  
15 as the main specific antigen targeted in absence of iTregs. When rederived to a  
16 different *Hh*-free SPF-microbiota, mice showed few signs of disease without fatalities,  
17 but upon recolonization of mice with *Hh* we found rapid disease onset and the  
18 generation of inflammatory Th17/Th1 and Th1 cells in the colon. Thus, the present  
19 work identifies a major bacterial antigen and highlights the impact of specific  
20 microorganisms on modulating the host immune response and its role on disease  
21 onset, progression and outcome in this colitis model.

22

## 1 Introduction

2

3 The large intestine is colonized with about  $10^{11}$  -  $10^{12}$  bacterial cells / g of luminal  
4 content <sup>1</sup>, to which mucosal immune cells are constantly exposed. These interactions  
5 are indispensable to generate tolerance towards harmless commensals or immunity to  
6 invading pathogens. It is commonly accepted that the intestinal microbiota has a critical  
7 impact on modulating host immune responses in both health and disease <sup>2, 3, 4</sup>.  
8 However, multiple genetic and environmental factors such as immune deficiency,  
9 infection, inflammation or antibiotic treatment can alter the microbial composition and  
10 direct mucosal homeostasis towards dysbiosis. Inflammatory Bowel Disease (IBD) is  
11 linked to dysbiosis and many studies could reveal altered bacterial compositions in IBD  
12 patients <sup>5, 6, 7</sup>. However, it still remains elusive whether dysbiosis is the cause or rather  
13 a consequence of IBD <sup>8</sup>.

14 IL-17-producing T helper (Th17) cells are not detectable in the intestine of germ-free  
15 mice but can be effectively induced in the small intestinal Lamina Propria (LP) by  
16 mono-colonization with segmented filamentous bacteria <sup>9, 10</sup>. Also, regulatory T cells  
17 (Tregs) are known to be affected by the gut microbiota as *Clostridium* clusters IV and  
18 XIVa are potent drivers of IL-10<sup>+</sup>Helios<sup>-</sup> induced T regs (iTregs) <sup>11</sup>. Furthermore, the  
19 human commensal *Bacteroides fragilis* is capable of promoting mucosal tolerance as  
20 its polysaccharide A leads to differentiation of CD4<sup>+</sup> T cells into IL-10 producing Tregs  
21 in the steady state but also under inflammatory conditions <sup>12</sup>. Of note, *Bacteroides* can  
22 also contribute to disease development under certain conditions <sup>13</sup> and, *B. fragilis* was  
23 reported to be enriched in IBD patients <sup>14</sup>. These examples and other reports illustrate  
24 how the immune system is shaped by microbiota of the gut. Similarly, the murine  
25 commensal *Helicobacter hepaticus* (*Hh*) is found in many academic and commercial  
26 mouse colonies <sup>15, 16</sup> and infection with *Hh* is linked to chronic hepatitis as well as

1 hepatocellular carcinoma <sup>17, 18</sup>. *Hh* is also able to elicit intestinal inflammation in  
2 immunodeficient or immunocompromized mice. For example, adoptive transfer of  
3 CD4<sup>+</sup> T cells into mice with severe combined immunodeficiency (*scid*) <sup>19</sup> or Rag2-  
4 deficiency <sup>20</sup> develop colitis only in presence of *Hh*. Also, IL-10- or T cell-deficient mice  
5 require *Hh* for development of IBD <sup>21 22, 23</sup>. However, there are still major gaps in our  
6 understanding of the complex interaction between the microbial community and/or  
7 certain single species and the host.

8 We recently published a novel CD40-mediated mouse model of spontaneous colitis,  
9 where CD11c-specific constitutive CD40-signaling leads to migration of CD103<sup>+</sup> DCs  
10 from the colonic LP to draining lymph nodes followed by DC-apoptosis <sup>24</sup>. Loss of  
11 tolerogenic CD103<sup>+</sup> DCs caused a lack of ROR $\gamma$ t<sup>+</sup>Helios<sup>-</sup> iTregs and an increase of  
12 inflammatory IL-17<sup>+</sup>IFN- $\gamma$ <sup>+</sup> Th17/Th1 and IFN- $\gamma$ <sup>+</sup> Th1 cells in the colon, resulting in the  
13 breakdown of mucosal tolerance and fatal colitis <sup>24, 25</sup>. A consequence of this IBD was  
14 malabsorption of nutrients and cholesterol due to IBD <sup>26</sup>. Of note, this model mimics  
15 the human IBD situation, as CD40-CD40L interactions are of relevance to the  
16 pathogenesis of IBD <sup>27, 28, 29, 30, 31, 32, 33</sup>.

17 In the present study we focused on microbial-host interactions in the CD40-mediated  
18 colitis model to determine how the intestinal microbiota can modulate the host immune  
19 response. We identified *Hh* as disease driver with impact on disease onset,  
20 progression and outcome in mice with DC-specific constitutive CD40-signaling. The  
21 immune response of diseased animals targets *Hh* and we identified GroEL, a 60kDa  
22 *Hh*-protein as a main antigen recognized by immunoglobulins during onset of fatal IBD.  
23 Rederivation of the mice to *Hh*-free state saved mice from fatal colitis. This suggested,  
24 that *Hh* could trigger colitis and specific immune responses in an iTreg-free setting.

25

## 1 **Results**

2 **Early disease onset in DC-LMP1/CD40 mice is associated with increasing serum**  
3 **antibody levels specific for bacterial antigens.** To obtain further insight into the  
4 complex interplay of microbiota, adaptive immunity and inflammation in CD40-  
5 mediated colitis, we first determined the disease onset in DC-LMP1/CD40 mice by  
6 measuring fecal lipocalin-2, a sensitive non-invasive inflammatory marker<sup>34</sup>. Lipocalin-  
7 2 levels were significantly increased in DC-LMP1/CD40 mice starting on week 5 (Fig.  
8 1A), indicating a very early disease onset due to constitutive CD40-signaling on DCs  
9 as published previously<sup>24</sup>. To measure a potential impact on adaptive immunity, we  
10 then analyzed IgG and IgA serum levels in these animals during colitis progression.  
11 Compared to control littermates, DC-LMP1/CD40 mice showed elevated total serum  
12 IgG- as well as IgA-levels already at 6 weeks and increased further with age (Fig. 1B).  
13 As mice with spontaneous colitis have the propensity to develop antibody responses  
14 against commensal bacteria<sup>35</sup>, we next set out to identify antibody specificities in DC-  
15 LMP1/CD40 mice. To this end we used cecal bacterial lysate (CBL) from non-  
16 transgenic C57BL/6 mice of the same colony, representing unaltered intestinal  
17 microbiota for ELISA<sup>35</sup>. In DC-LMP1/CD40 mice serum IgG response to commensal  
18 antigens was significantly increased at the 10-week time point if compared to control  
19 littermates (Fig. 1C, left). In contrast, we detected significantly higher serum IgA  
20 reactivities starting at the age of 10 weeks at all time points analyzed (Fig. 1C, right).  
21 To further visualize bacterial antigens potentially recognized by serum Ig from DC-  
22 LMP1/CD40 mice, we tested these sera also by immunoblotting (Fig. 1D). Serum IgG  
23 from both, DC-LMP1/CD40 mice and control littermates, detected some proteins of  
24 different sizes ranging from 10 to 250 kDa (Fig. 1D, left). However, in contrast to sera  
25 from controls, each serum IgG sample from DC-LMP1/CD40 mice showed reactivity  
26 with a protein of about 60 kDa (Fig. 1D, left). This reactivity increased with the

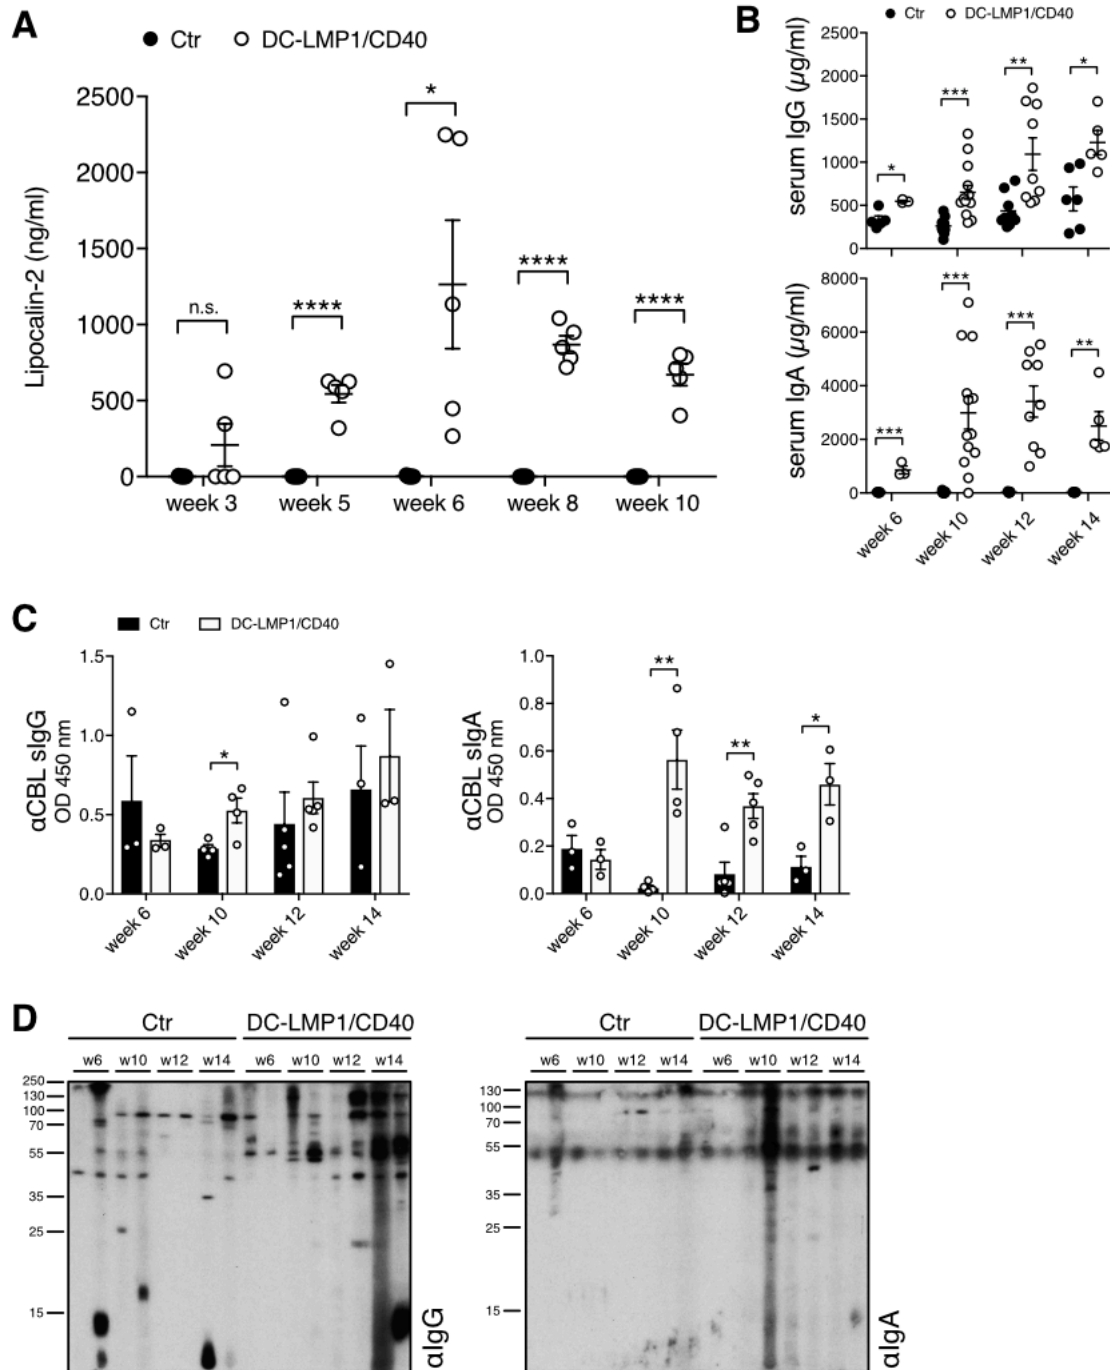

**Figure 1: Early disease onset and increasing serum antibody titers**

(A) Levels of fecal lipocalin-2 were measured by ELISA in Ctr and DC-LMP1/CD40 mice at indicated time points. Data is shown as mean  $\pm$  SEM (n=5). (B) Total IgG (upper panel) or IgA (lower panel) concentrations in sera from Ctr and DC-LMP1/CD40 mice at the indicated time points were measured by ELISA. Data from two pooled experiments is shown as mean  $\pm$  SEM (n=3-13). (C-D) Serum IgG (left) and IgA (right) response in Ctr and DC-LMP1/CD40 mice towards commensal antigens within the CBL was determined by (C) ELISA (mean  $\pm$  SEM, n=3-5 per group and time point) or (D) immunoblotting at the indicated time points (n=2 per group and time point, each lane represents one serum sample from Ctr or DC-LMP1/CD40 mice). Goat anti-mouse IgG-HRP or goat anti-mouse IgA-HRP were used as secondary antibodies.

1 age of mice (Fig. 1D, left). Also, serum IgA from 10-, 12- and 14-week samples of DC-  
2 LMP1/CD40, but not control mice, detected proteins around 60 kDa (Fig. 1D, right).  
3 Our data reveal a very early disease onset in DC-LMP1/CD40 mice simultaneously  
4 with an increase of serum reactivity against commensal antigens present in CBL from  
5 healthy mice of the same colony.

6

7 **Serum antibodies from DC-LMP1/CD40 mice are specific for a 60 kDa chaperonin**  
8 **from *Helicobacter hepaticus*.** To identify antigens recognized by serum Ig in DC-  
9 LMP1/CD40 animals, we performed liquid chromatography tandem mass spectrometry  
10 (LC-MS/MS) (Fig. 2A). For this approach, serum antibodies were coupled to beads and  
11 incubated with CBL for binding of potential target proteins. Upon immunoprecipitation  
12 we performed on-bead digestion of proteins followed by LC-MS/MS. The resulting peak  
13 intensities were finally used for intensity-based absolute quantification (iBAQ). Proteins  
14 identified with a fold change > 2 and a  $p$ -value < 0.05 were considered for further  
15 analyses. Interestingly, the results provided only five proteins precipitated by serum  
16 antibodies from DC-LMP1/CD40 mice and two proteins by control serum antibodies  
17 (Fig. 2B) that met these requirements. We focused on proteins precipitated by serum  
18 antibodies from DC-LMP1/CD40 animals with the highest fold change and lowest  $p$ -  
19 value, which were (i) the 60 kDa chaperonin GroEL (Hsp60) from *Helicobacter*  
20 *hepaticus* (*Hh*) (CH60\_HELHP, 8.36-fold change,  $p$ -value < 0.00001) and (ii) the  
21 probable peroxiredoxin from *Helicobacter pylori* (TSAA\_HELPJ, 9.93-fold change,  $p$ -  
22 value < 0.000001). The data analysis for the number of precipitated peptides and the  
23 percentage of sequence coverage of the protein revealed that the CH60\_HELHP was

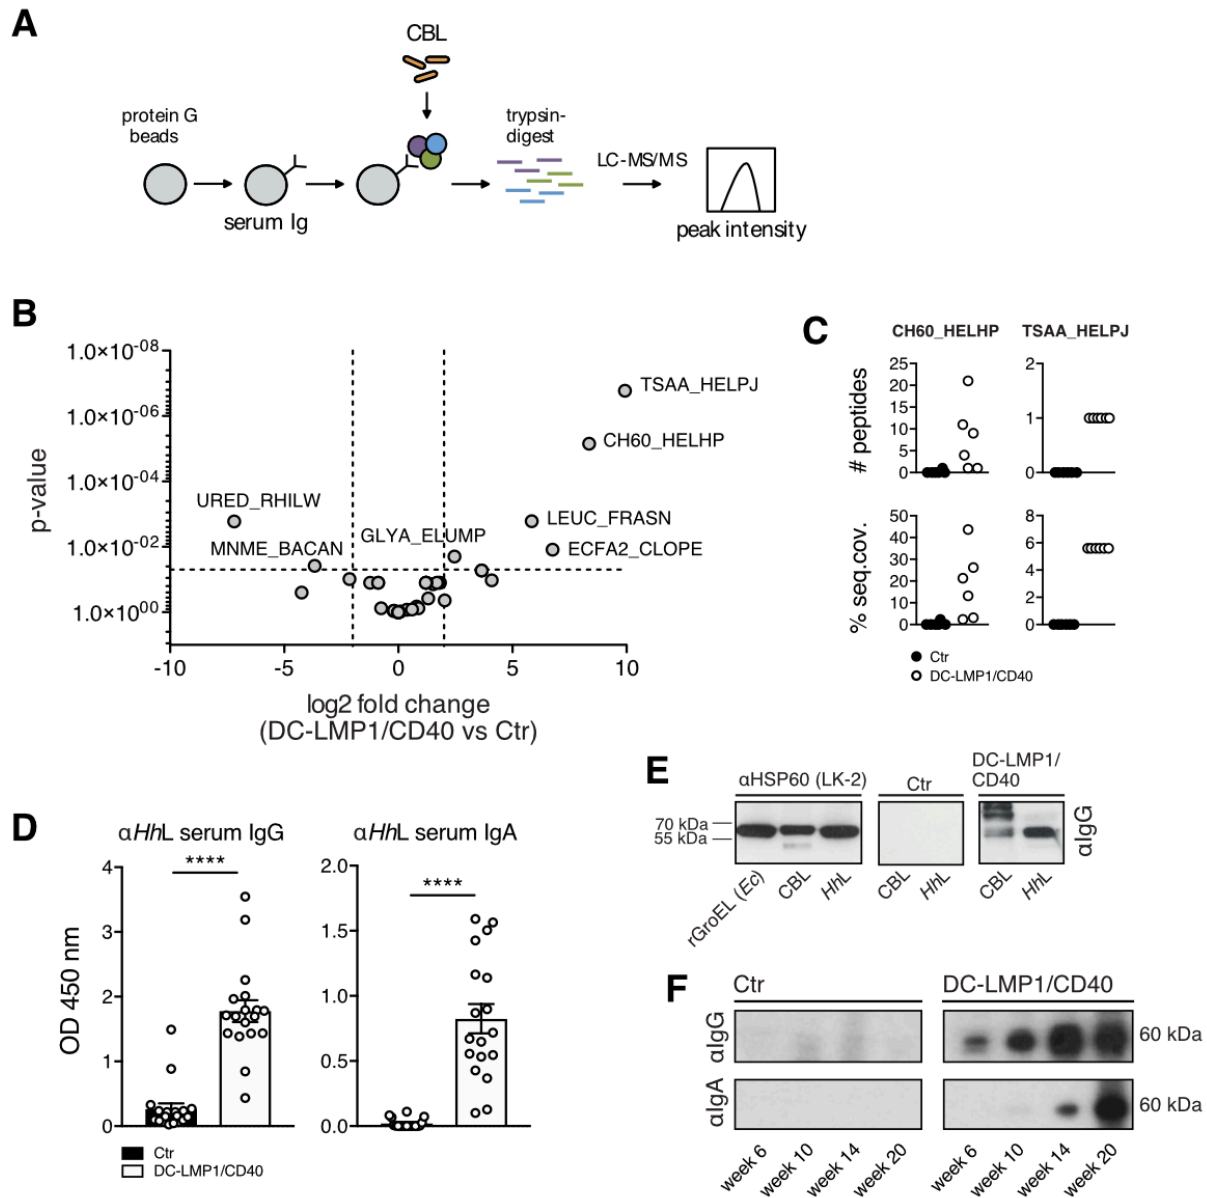

**Figure 2: Analysis of fecal antigens.**

(A) Schematic illustration of sample preparation for liquid chromatography tandem mass spectrometry (LC-MS/MS). Protein G beads were coupled with serum antibodies from Ctr or DC-LMP1/CD40 mice to bind commensal antigens within the CBL. Upon immunoprecipitation, proteins were trypsin-digested, analyzed by LC-MS/MS and the resulting peak intensity was used for intensity-based absolute quantification (iBAQ) (pooled results from two experiments,  $n=6$ ). (B) Results obtained with iBAQ as described in (A) are illustrated by the volcano plot. Identified proteins were considered as interaction partners if the  $\log_2$  difference between the iBAQ values in the DC-LMP1/CD40 condition and the controls were higher than 2 and the p-value smaller than 0.05 (ANOVA). (C) Data illustrates the number of peptides (upper panel) and percentage of protein sequence coverage (lower panel) of the identified CH60\_HELHP and TSAA\_HELPJ in (B). Each symbol represents one single mouse. (D) Serum IgG (left) and IgA (right) response in Ctr and DC-LMP1/CD40 mice towards lysate from *Hh* (*HhL*) was determined by ELISA (mean  $\pm$  SEM,  $n=18$ ). (E) Detection of the 60 kDa protein in *HhL* and CBL by immunoblotting. 20  $\mu$ g *HhL*, 50  $\mu$ g CBL or 0.5  $\mu$ g recombinant GroEL from *E. coli* (rGroEL (*Ec*)) were separated by SDS-PAGE. Anti-HSP60 (left, clone LK-2: recognizing both human and bacterial Hsp60, mouse IgG1 isotype) as well as sera from Ctr (middle) and DC-LMP1/CD40 (right) mice were used as primary antibodies. Anti-mouse IgG-HRP was used as secondary antibody. (F) Sera screening for the detection of the 60 kDa chaperonin from *Hh* by immunoblotting. 200  $\mu$ g *HhL* were separated by SDS-PAGE and sera from Ctr or DC-LMP1/CD40 mice at the indicated age were used as primary antibodies with each lane representing one serum sample. Anti-mouse IgG-HRP (upper panel) or anti-mouse IgA-HRP (lower panel) were used as secondary antibodies.



1 identified by 1-21 peptides with a sequence coverage ranging from 2.4 % up to 43.7  
2 % (Fig. 2C). In contrast, TSAA\_HELPJ was identified by only one peptide and with a  
3 sequence coverage of only 5.6 % for every single DC-LMP1/CD40 serum sample (Fig.  
4 2C). This protein from *H. pylori* was not considered for further analyses as both, the  
5 numbers of peptides as well as the percentage of protein sequence coverage were not  
6 reliable. One explanation for recovering a protein from *H. pylori* with this approach  
7 might be the fact that about 50 % of total proteins from *Hh* have orthologs in *H. pylori*  
8 <sup>36</sup> and therefore might arise by the analysis within the bacterial database used for  
9 iBAQ. Indeed, blasting the precipitated *H. pylori* peptide against the *Hh* proteome  
10 resulted in 100 % identity with peroxiredoxin from *Helicobacter* multispecies as well as  
11 70 % identity with chemotaxis protein from *Hh*.

12 To exclude biased results due to differences in serum antibody amounts from DC-  
13 LMP1/CD40 and control animals bound by protein G beads, samples were adjusted  
14 by calculating equal amounts of serum IgG before coupling onto the beads and also  
15 the peak intensities of Ig-related proteins were quantified within the same experiment.  
16 Here, DC-LMP1/CD40 and control serum samples showed no differences in Ig-related  
17 protein intensities (Fig. S1), indicating equal coupling of serum Ig from control and  
18 transgenic mice.

19 We next tested serum antibody reactivity from DC-LMP1/CD40 mice towards whole  
20 *Hh*-lysate (*HhL*) by ELISA (Fig. 2D) and immunoblotting (Fig. 2E, 2F). Indeed, both,  
21 serum IgG as well as IgA from DC-LMP1/CD40 mice showed a strong reactivity  
22 towards *HhL* when compared to sera from control littermates by ELISA (Fig. 2D). To  
23 detect GroEL from *Hh* by immunoblotting, we used the monoclonal anti-human heat  
24 shock protein 60 ( $\alpha$ Hsp60) antibody (clone LK-2, mouse IgG1 isotype) as positive  
25 control, which specifically recognizes both, human Hsp60 and the bacterial homologue  
26 GroEL <sup>37</sup>. As expected, in Western blot analyses  $\alpha$ Hsp60 (LK-2) detected recombinant

1 GroEL from *E. coli* (rGroEL (*Ec*)), from CBL and from *HhL* (Fig. 2E, left panel),  
2 confirming the specificity of this Ab and the presence of GroEL in CBL used for this  
3 screening. Furthermore, in contrast to sera from control littermates (Fig. 2E, middle  
4 panel), sera from DC-LMP1/CD40 mice (Fig. 2E, right panel) detected a band of the  
5 same size in CBL as well as in *HhL*. Interestingly, we detected GroEL in *HhL* with  
6 serum IgG from DC-LMP1/CD40 animals with every age tested and this reactivity was  
7 increasing with the age of mice (Fig. 2F). In contrast, GroEL detection in *HhL* with  
8 serum IgA from DC-LMP1/CD40 mice was observed only with sera obtained from mice  
9 at the age of 14 weeks and older (Fig. 2F). However, there was no GroEL-specific  
10 signal detected neither with serum IgG nor IgA from control mice (Fig. 2F), although  
11 their CBL did contain *Hh* (Fig. 2E and see below). Taken together, we identified the 60  
12 kDa chaperonin GroEL from *Hh* as potential antigen recognized by the immune system  
13 during early colitis onset, indicating that *Hh* could be a disease driver in the DC-  
14 LMP1/CD40 colitis model.

15

16 ***Helicobacter hepaticus*-free DC-LMP1/CD40 mice are protected from early**  
17 **disease onset.** The intestinal bacterium *Hh* is associated with IBD and induces  
18 spontaneous colitis in immunodeficient mice with severe combined immunodeficiency  
19 or IL10-deficient mice<sup>19, 21</sup>. The fact, that we found *Hh*-specific Ig in sera of DC-  
20 LMP1/CD40 mice suggested that this mouse colony was endemically infected by *Hh*.  
21 To test this, we screened the fecal content from mice for presence of *Helicobacter* by  
22 genus- as well as species-specific PCR (Fig. 3A). We found the genus *Helicobacter*  
23 (*Hspp*) throughout all DC-LMP1/CD40 and control littermates (Fig. 3A). Moreover, all  
24 control littermates were consistently colonized with *Hh* (Fig. 3A, B). Surprisingly, young  
25 DC-LMP1/CD40 mice showed reduced prevalence already in week 3 of age, when  
26 only 57.1 % *Hh*-positive transgenic animals could be detected, in contrast to 100 %

1 control littermates (Fig. 3B). Furthermore, *Hh* was hardly detectable in older DC-  
 2 LMP1/CD40 mice, as in 10-week-old animals only 8.3 % were *Hh*-positive as  
 3 compared to 100

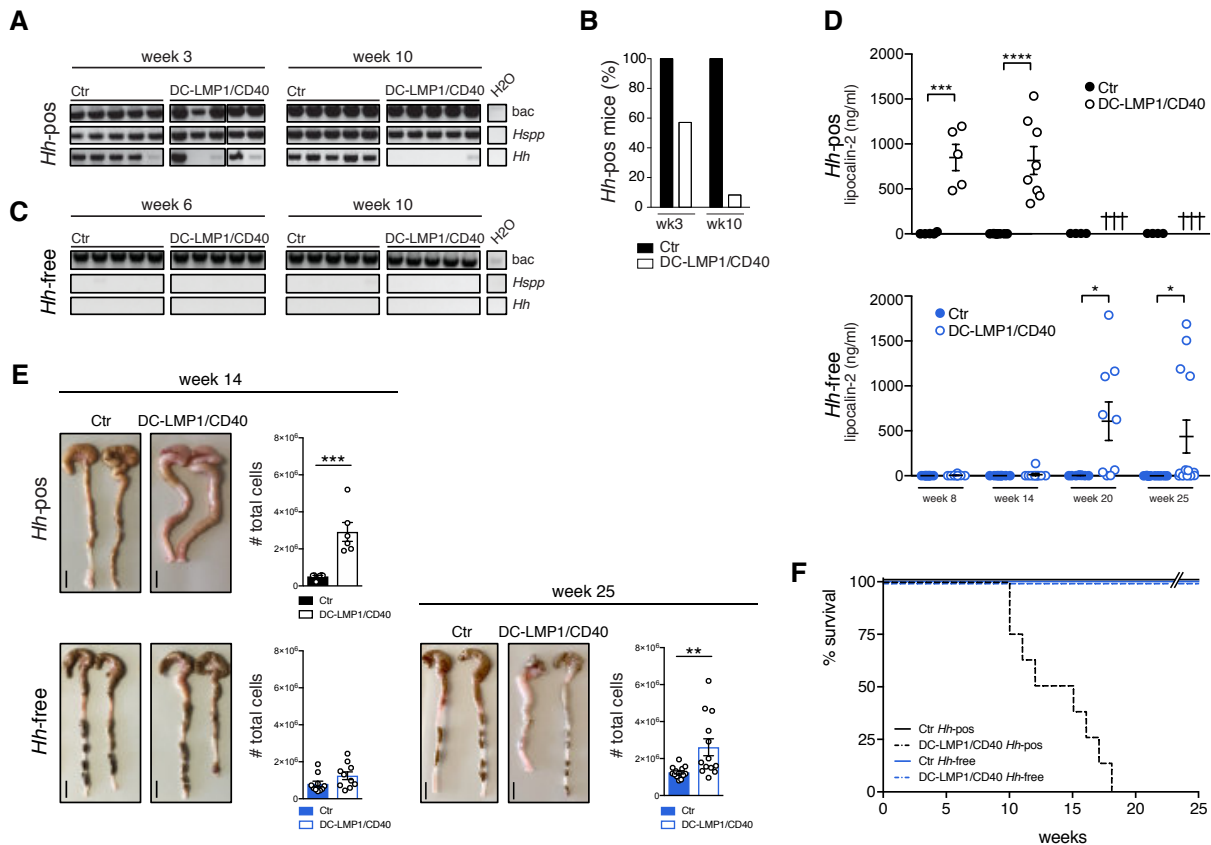

**Figure 3: *Hh*-free DC-LMP1/CD40 are protected from early disease onset.**

(A) Bacterial DNA was extracted from Ctr or DC-LMP1/CD40 mice before rendering them *Hh*-free at the indicated time points. 16S rRNA gene primers were used to detect the species indicated and amplicons were analyzed by gel electrophoresis (n=7-14, shown are n=5 per group). (B) Data for *Hh*-pos animals from (A) is represented as bar graphs, illustrating the percentage of 3- or 10-week-old Ctr and DC-LMP1/CD40 animals tested positive for *Hh* before rendering them *Hh*-free (n=7-14 per group). (C) Bacterial DNA was extracted from Ctr or DC-LMP1/CD40 mice after rendering them *Hh*-free at the indicated time points. 16S rRNA gene primers were used to detect the species indicated and amplicons were analyzed by gel electrophoresis (n=5-9, shown are n=5 per group). (D) Levels of fecal lipocalin-2 were measured by ELISA in *Hh*-pos (upper panel) or *Hh*-free (lower panel) Ctr and DC-LMP1/CD40 mice at the indicated time points. Shown are data from two pooled experiments for *Hh*-pos animals (n=5-9) and for *Hh*-free animals (n=9-13) as mean  $\pm$  SEM. Crosses represent already dead animals at the indicated time points. (E) Macroscopic pictures as well as total cell number of colons from *Hh*-pos (upper panel) or *Hh*-free (lower panel) Ctr and DC-LMP1/CD40 animals at the indicated time points. Shown are two representative colon pictures per group with scale bars = 1 cm. Bar graphs show total colon cell numbers in Ctr and DC-LMP1/CD40 mice from three pooled experiments (mean  $\pm$  SEM, n=6-13). (F) Kaplan-Meier plot showing survival of *Hh*-free and *Hh*-pos Ctr and DC-LMP1/CD40 animals (n=10). Data for *Hh*-pos animals were taken from figure 2 in our previous publication<sup>38</sup>. bac: bacteria; Hsp: *Helicobacter species*; Hh: *H. hepaticus*

4 % of control littermates (Fig. 3B). Notably, we obtained similar results for colonization  
 5 with *H. typhlonius* (*Ht*) (Fig. S4). In contrast, all animals tested were also colonized by  
 6 *H. rodentium* (*Hr*), explaining consistent *Hsp* positive results (Fig. S4). None of the

1 animals was tested positive for *H. bilis* (*Hb*) (Fig. S4). Taken together, conventionally-  
2 housed mice were endemically colonized with *Hh*. The fact, that DC-LMP1/CD40  
3 animals show loss of *Hh* colonization in particular upon colitis progression suggests  
4 that these bacteria are eliminated by either ongoing immune responses or  
5 displacement by other bacteria during dysbiosis.

6 By embryo transfer we rederived mice to an *Hh*-free specific-pathogen-free (SPF)  
7 colony. *Hh*-colonization status was confirmed by genus- and species-specific PCR with  
8 fecal content from 6- and 10-week-old mice (Fig. 3C). Notably, all animals were tested  
9 negative for *Hh* (Fig. 3C) as well as *Ht*, *Hr* and *Hb* (Fig. S4). None of the *Hh*-free DC-  
10 LMP1/CD40 animals showed elevated fecal lipocalin-2 levels at the age of 8 or 14  
11 weeks, when *Hh*-positive (*Hh*-pos) DC-LMP1/CD40 mice had already significantly  
12 elevated fecal lipocalin-2 levels (Fig. 3D). Interestingly, we did detect significantly  
13 increased fecal lipocalin levels only at much later time points in some but not all *Hh*-  
14 free DC-LMP1/CD40 mice (Fig. 3D). At week 20, 55.5 % and at week 25 30.8 % of *Hh*-  
15 free transgenic mice showed elevated lipocalin-2 levels (Fig. 3D). When we compared  
16 the phenotype of *Hh*-pos and *Hh*-free animals at the age of 14 weeks, we observed  
17 neither macroscopic signs of colitis, nor elevated total cell numbers in the colonic LP  
18 of *Hh*-free DC-LMP1/CD40 animals (Fig. 3E). In contrast, 14 weeks old *Hh*-pos DC-  
19 LMP1/CD40 mice already showed signs of colitis such as shortened and thickened  
20 colon as well as strong increase in total colonic cell numbers (Fig. 3E and <sup>24</sup>). After 25  
21 weeks, some *Hh*-free DC-LMP1/CD40 mice also showed an inflamed phenotype with  
22 a shortened and thickened colon as well as increased cell numbers infiltrating the colon  
23 LP (Fig. 3E). Of note, *Hh*-free DC-LMP1/CD40 mice not only showed no morbidity but  
24 also normal survival rates. Compared to *Hh*-positive DC-LMP1/CD40 animals, which  
25 usually die between 10 to 18 weeks of age (Fig. 3F, <sup>38</sup>), none of *Hh*-free transgenic  
26 animals died before week 25, when they were finally analyzed (Fig. 3F). Our data

1 shows a substantial delay in disease onset as well as less morbidity of *Hh*-free DC-  
2 LMP1/CD40 mice, indicating a crucial role for this microbe in disease initiation and  
3 outcome in CD40-mediated colitis.

4

5 **Conventionally-housed but not SPF-housed DC-LMP1/CD40 mice show changes**  
6 **in intestinal taxa composition upon colitis onset.** To reveal the role of commensals  
7 in colitis initiation, we further analyzed intestinal taxa composition at family level in both  
8 conventionally-housed and SPF-housed mice by 16S rRNA gene sequencing of fecal  
9 samples (Fig. 4). In conventionally-housed mice, microbial changes in 8-week-old mice  
10 turned out to be genotype-dependent when compared to 3-week-old mice (Fig. 4A).  
11 We observed microbial changes in colitis-diseased 8-week-old DC-LMP1/CD40  
12 animals when compared to control littermates, indicating dysbiosis upon colitis onset,  
13 confirming our previous finding of reduced microbial diversity in diseased transgenic  
14 mice <sup>24</sup> (Fig. 4A). As expected, when we rederived the mice to an *Hh*-free SPF  
15 microbiota, the overall complexity of taxa composition at family level was strongly  
16 reduced, independent of their genotype or age (Fig. 4A). Interestingly, we could also  
17 not observe substantial differences in the taxonomic profile within 20-week-old SPF-  
18 housed DC-LMP1/CD40 mice (Fig. 4A). The differential taxa abundance in 8-week-old  
19 conventionally-housed and 20-week-old SPF-housed mice was further determined  
20 using the analysis composition of microbiomes (ANCOM) function (Fig. 4B). Here,  
21 conventionally-housed DC-LMP1/CD40 mice showed *Enterobacteriaceae* blooming,  
22 characteristic for dysbiosis during colitis <sup>39, 40</sup>, but also increased abundance of  
23 *Peptostreptococcaceae*, *Turicibacteraceae*, and *Enterococcaceae*, while we observed  
24 only increased abundance of *F16* in control littermates (Fig. 4B, upper panel). In  
25 contrast, both SPF-housed transgenic and control littermates showed a very  
26 homogeneous and strongly limited microbial complexity (Fig. 4B, lower panel). Taken

- 1 together, *Hh*-free SPF transgenic and control mice show similar microbial composition
- 2 and no dysbiosis is evident in aged *Hh*-free DC-LMP1/CD40 mice.

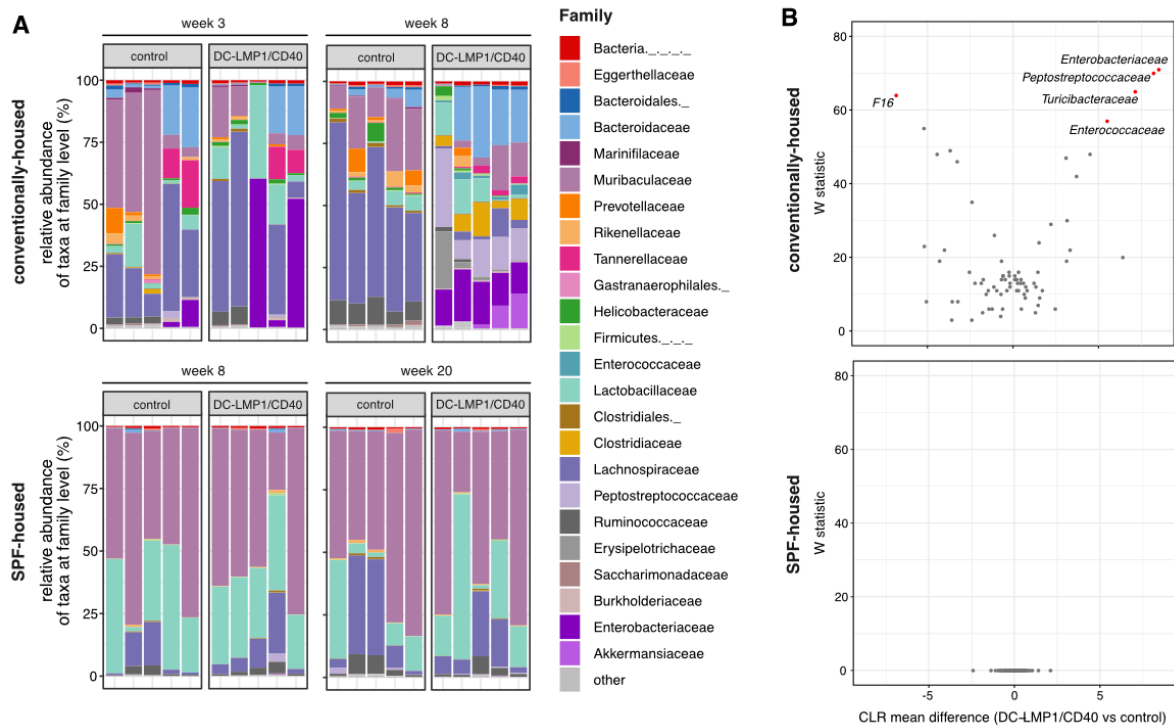

**Fig. 4: Conventionally-housed but not SPF-housed DC-LMP1/CD40 animals show changes in taxa composition.**

Analysis of the intestinal microbiota in fecal samples from conventionally-housed or SPF-housed control and DC-LMP1/CD40 mice at the indicated time points was based on sequencing the V3-V4 variable regions of the 16S rRNA gene (Illumina MiSeq). Filtered sequences were further processed using Qiime2 version 2020.2. A) Shown is the relative abundance of taxa at family level with each bar representing one animal (n=5 per group). Taxonomic assignment was performed with *classify-sklearn* using a classifier trained on SILVA database (Qiime version 132 99% 16S). B) Differential abundance in 8-week-old conventionally-housed or 20-week-old SPF-housed DC-LMP1/CD40 mice vs control littermates was estimated using the ANCOM function after collapsing to taxonomic level 5 and adding pseudo counts. CLR: Centered Log Ratio.

- 3
- 4 **DC-LMP1/CD40 mice rapidly develop strong intestinal inflammation upon**
- 5 **colonization with *Hh*.** To investigate if *Hh* is causal for disease initiation, we
- 6 inoculated 8-week-old *Hh*-free animals with *Hh* (strain ATCC 51448) by oral gavage
- 7 (Fig. 5A). Already at day 21 post inoculation (p.i.), all DC-LMP1/CD40 mice and control
- 8 littermates, but not PBS-treated mice were *Hh*-positive as shown by species-specific
- 9 PCR from feces (Fig. 5B). At day 40 p.i., when mice were finally sacrificed for analysis,

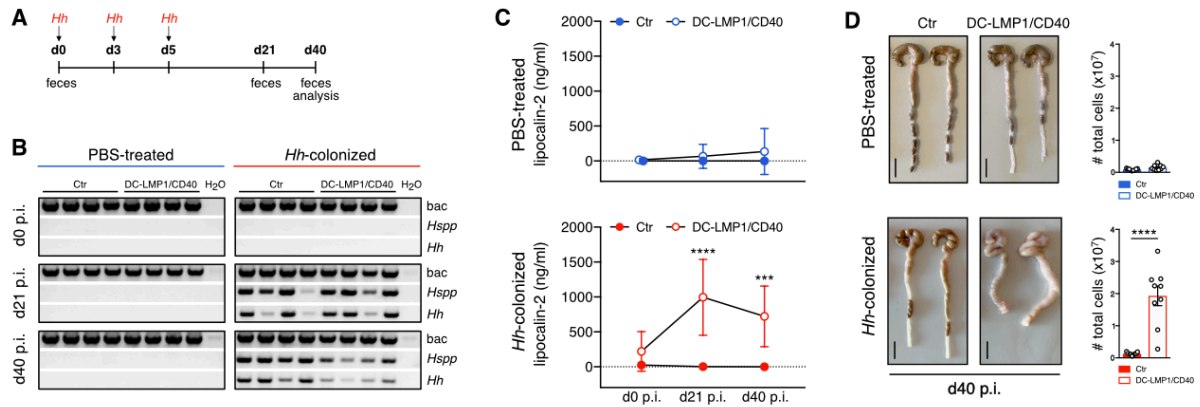

### Figure 5: Strong intestinal inflammation upon *Hh*-recolonization

(A) Schematic illustration of colonization of *Hh*-free Ctr and DC-LMP1/CD40 mice with a pure culture of *Hh* by oral gavage at the indicated time points. Feces were collected at the indicated time points and animals were sacrificed 40 days p.i. (B) Bacterial DNA was extracted from fecal samples at the indicated time points from PBS-treated or *Hh*-colonized Ctr and DC-LMP1/CD40 mice at the indicated time points. *Hh*-colonization was confirmed by PCR. Shown is one representative experiment out of two (n=4). (C) Fecal lipocalin-2 levels in PBS-treated or *Hh*-colonized Ctr and DC-LMP1/CD40 mice were determined by ELISA at the indicated time points. Data is shown as scatter plot for two pooled experiments with mean  $\pm$  SEM (n=9). (D) PBS-treated or *Hh*-colonized Ctr and DC-LMP1/CD40 mice were sacrificed at day 40 p.i.. Shown are macroscopic pictures of two representative colons per group (scale bars = 1 cm) as well as bar graphs, representing total colon LP cell numbers from two pooled experiments with mean  $\pm$  SEM (n=9). Bac: bacteria; *Hspp*: *Helicobacter* species; *Hh*: *H. hepaticus*

- 1 all *Hh*-colonized mice were still *Hh* positive (Fig. 5B). Of note, all mice were negative
- 2 for the other most relevant *Hspp* which are also routinely tested according to FELASA
- 3 recommendations, confirming mono-colonization with *Hh* by oral gavage (Fig. S5).
- 4 Furthermore, *Hh*-infected DC-LMP1/CD40 mice did show significantly elevated fecal
- 5 lipocalin-2 levels compared to control littermates already on day 21 p.i., indicating a
- 6 rapid disease onset upon colonization with *Hh* (Fig. 5C). By d40 p.i., *Hh*-infected DC-
- 7 LMP1/CD40 mice, but not control littermates showed a strong increase in cells
- 8 infiltrating the colonic LP as well as a shortened and thickened colon, indicating
- 9 ongoing inflammation and colitis (Fig. 5D). In contrast, PBS-treated DC-LMP1/CD40
- 10 and control mice did not have elevated lipocalin-2 levels in their feces (Fig. 5C), neither
- 11 did they show elevated cell numbers nor macroscopic changes of the large intestine
- 12 (Fig. 5D) as observed previously in 14-week-old mice (Fig. 3D, E). Thus, our data
- 13 reveal that *Hh* is rapidly provoking strong intestinal inflammation in DC-LMP1/CD40

1 mice, indicating that this bacterial stimulus combined with CD40-signaling on DCs and  
2 absent iTregs is causing the development of early onset colitis.

3

4 ***Helicobacter hepaticus* affects colonic CD4<sup>+</sup> T cell differentiation.** We previously  
5 reported the effect of constitutive CD40-signaling on intestinal DCs <sup>24</sup>. Transgenic  
6 animals did show a strong reduction of tolerogenic CD103<sup>+</sup> DC subsets in the colonic  
7 LP and mLNs. As a consequence, ROR $\gamma$ t<sup>+</sup>Helios<sup>-</sup> iTreg generation was drastically  
8 impaired in the large intestine of DC-LMP1/CD40 animals. As the mouse colony used  
9 for our previous study was endemically infected by *Hh* (Fig. 3A, B), we wondered  
10 whether *Hh* is responsible for the phenotypical changes we observed in this colitis  
11 model. Therefore, we next analyzed cell subsets in the colonic LP of *Hh*-free DC-  
12 LMP1/CD40 and control littermates. We did find a strong reduction in CD103<sup>+</sup>CD11b<sup>-</sup>  
13 as well as CD103<sup>+</sup>CD11b<sup>+</sup> intestinal DCs in 14-week-old *Hh*-free DC-LMP1/CD40  
14 animals but not control littermates (Fig. 6A), similar to what we previously described  
15 for *Hh*-pos animals <sup>24</sup>. Furthermore, ROR $\gamma$ t<sup>+</sup>Helios<sup>-</sup> iTregs were also significantly  
16 reduced in the colonic LP of 14-week-old *Hh*-free DC-LMP1/CD40 mice, but not control  
17 animals (Fig. 6B) comparable with our previous findings in *Hh*-pos animals <sup>24</sup>. Of note,  
18 the reduction of intestinal CD103<sup>+</sup> DCs as well as ROR $\gamma$ t<sup>+</sup>Helios<sup>-</sup> iTregs was also found  
19 in 25-week-old *Hh*-free DC-LMP1/CD40 mice, but not control animals (Fig. S6).  
20 Therefore, we conclude that the phenotypical changes in DC-LMP1/CD40 mice are  
21 rather a consequence of the transgene expression in DCs, suggesting that *Hh* has no  
22 direct impact on DC or Treg differentiation in this model.

23 We also know from our previous study that DC-LMP1/CD40 mice show a strong  
24 increase in IL-17<sup>+</sup>IFN- $\gamma$ <sup>+</sup> Th17/Th1 and IFN- $\gamma$ <sup>+</sup> Th1 cells in the colonic LP, indicating  
25 that non-pathogenic Th17 cells in DC-LMP1/CD40 mice are differentiating into



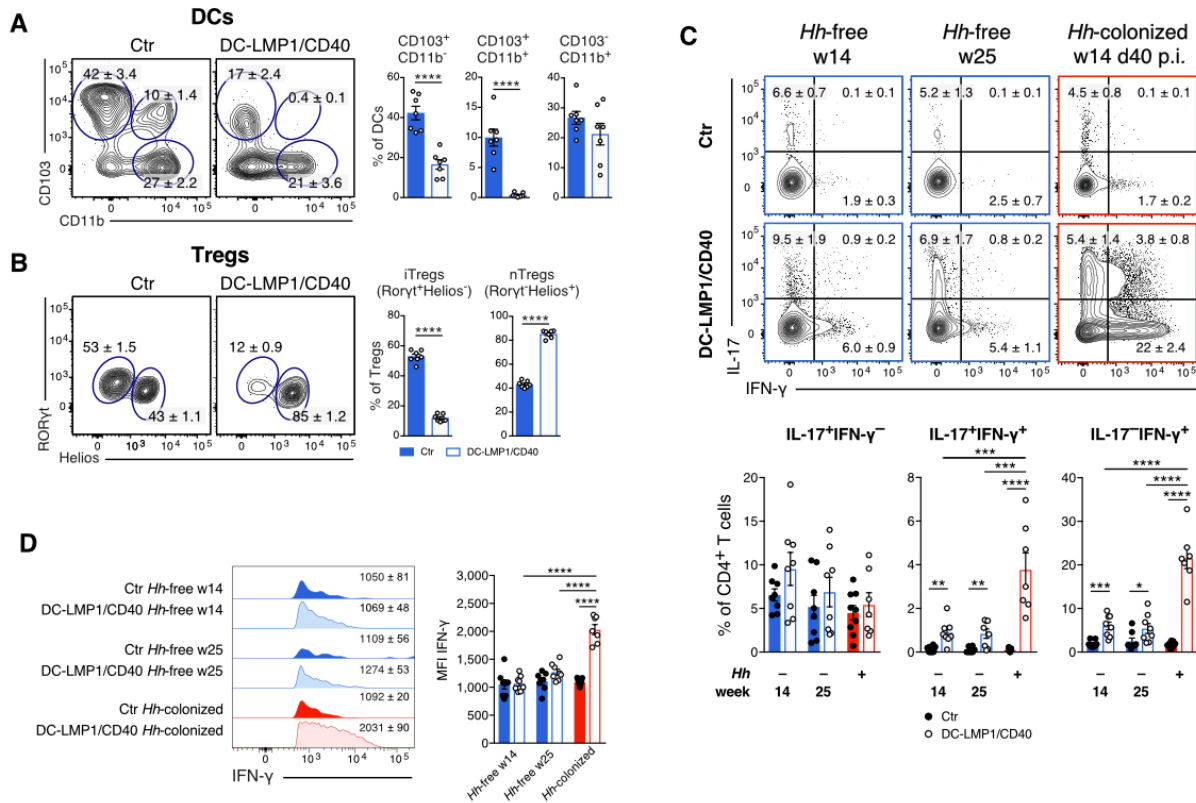

### Figure 6: *Hh* affects colonic T cell-fate decisions

Different cell subsets in the colonic LP were analyzed in 14-week-old *Hh*-free Ctrl and DC-LMP1/CD40 animals. Shown are representative FACS-plots as well as pooled statistics from two experiments (mean ± SEM, n=7), illustrating frequencies of the indicated cell subsets. (A) DCs were gated on single, live, CD45<sup>+</sup>, MHCII<sup>+</sup>CD11c<sup>+</sup>, CD64<sup>-</sup> cells. (B) Tregs were gated on single, live, CD45<sup>+</sup>, CD3<sup>+</sup>CD4<sup>+</sup>, FoxP3<sup>+</sup>CD25<sup>+</sup>, RORγt<sup>+</sup>Helios<sup>-</sup> (iTregs) or RORγt<sup>+</sup>Helios<sup>+</sup> (nTregs). Single-cell suspensions of the colonic LP from 14- and 25-week-old *Hh*-free or *Hh*-infected Ctrl or DC-LMP1/CD40 (14-weeks-old, 40 days post *Hh*-infection) mice were stimulated with PMA/Ionomycin and subsequently stained intracellularly for IL-17 and IFN-γ production at the indicated time points. Bar graphs represent pooled statistics from two experiments (mean ± SEM, n=7-9) animals. (C) T cells were pre-gated on single, live, CD45<sup>+</sup>, CD3<sup>+</sup>CD4<sup>+</sup> cells. Shown are representative FACS-plots as well as bar graphs, illustrating the frequencies of indicated cell subsets within the CD4<sup>+</sup> T cell population. (D) Shown are representative histograms as well as bar graphs, illustrating the MFI of IFN-γ expression within cells within IFN-γ<sup>+</sup> CD4<sup>+</sup> T cells from (C) as median ± SEM.

- 1 pathogenic Th1 cells<sup>24</sup>. To evaluate the role of *Hh* in this CD4<sup>+</sup> T cell differentiation
- 2 process, we compared IL-17- and IFN-γ-producing CD4<sup>+</sup> T cells in different mice (Fig.
- 3 6C). We did not detect significantly different frequencies of IL-17<sup>+</sup>CD4<sup>+</sup> T cells in DC-
- 4 LMP1/CD40 or control animals, neither in *Hh*-free nor in *Hh*-infected animals (Fig. 6C).
- 5 However, at day 40 p.i., *Hh*-infected DC-LMP1/CD40 mice had significantly increased
- 6 frequencies of both, IL-17<sup>+</sup>IFN-γ<sup>+</sup> Th17/Th1 and IFN-γ<sup>+</sup> Th1 cells when compared to
- 7 14- or 25-week-old *Hh*-free DC-LMP1/CD40 mice (Fig. 6C). Of note, also *Hh*-free

1 transgenic animals showed some induction of IL-17<sup>+</sup>IFN- $\gamma$ <sup>+</sup> Th17/Th1 and IFN- $\gamma$ <sup>+</sup> Th1  
2 cells in the colonic LP when compared to appropriate control littermates (Fig. 6C).  
3 However, when we analyzed the mean fluorescence intensity (MFI) of IFN- $\gamma$   
4 expression in IFN- $\gamma$ <sup>+</sup> CD4<sup>+</sup> T cells, only Th1 cells from *Hh*-infected DC-LMP1/CD40  
5 mice produced significantly higher amounts of IFN- $\gamma$  when compared to *Hh*-free  
6 transgenic animals (Fig. 6D). Taken together, we could show that *Hh* has the potential  
7 to rapidly initiate the transdifferentiation of non-pathogenic Th17 into pathogenic Th1  
8 cells in the colonic LP devoid of tolerogenic CD103<sup>+</sup> DCs and iTregs. However, this is  
9 not an exclusive property of *Hh* but can also be accomplished in *Hh*-free mice by other  
10 commensals or mechanisms, yet with much less efficacy.

11

## 1 **Discussion**

2 In this study we identified the murine commensal *Helicobacter hepaticus* as driver of  
3 the pathogenesis in a CD40-mediated model of colitis. Upon very early colitis onset,  
4 DC-LMP1/CD40 animals showed elevated serum IgG- as well as IgA-levels. Although  
5 IgA is mainly produced locally in the gut, we observed elevated IgA levels and  
6 increased anti-commensal IgA also in sera of mice. To ensure mucosal homeostasis,  
7 the gut sustains tolerance towards commensal bacteria by restraining them by various  
8 mechanisms, including the secretion of protective anti-microbial peptides and bacteria-  
9 specific IgA. Thus, bacteria-specific antibodies are not detectable in sera from healthy  
10 SPF-housed mice <sup>41</sup>. However, during inflammatory conditions systemic antibodies  
11 can be produced as a consequence of mucosal barrier dysfunction and thus increased  
12 exposure of commensals to systemic sites <sup>42</sup>. The presence of commensal-specific  
13 serum antibodies in DC-LMP1/CD40 mice therefore suggests that  
14 compartmentalization might be broken in mice with colitis, leading to systemic antibody  
15 responses.

16 Only recently, it was reported that especially members of Proteobacteria are able to  
17 induce T cell-dependent serum IgA responses in conventionally-housed mice to  
18 protect them from lethal sepsis <sup>43</sup>. In this study commensal *Helicobacter muridarum*  
19 was identified as driving species, which would induce mucosal IgA-secreting plasma  
20 cells as well as IgA<sup>+</sup> bone marrow plasma cells <sup>43</sup>. Our data suggests that dysbiosis in  
21 DC-LMP1/CD40 mice affects dissemination of bacteria, inducing systemic IgG as well  
22 as IgA production. This hypothesis is also supported by human studies, reporting  
23 elevated serum antibody levels in IBD patients <sup>44, 45</sup>. However, we also found certain  
24 levels of bacteria-specific serum IgG in control littermates. One explanation for this  
25 observation might be that we used conventionally- but not SPF-housed mice for parts

1 of our study. This seems more analogous to healthy humans, where also some level  
2 of systemic bacteria-specific IgG has been reported, which do increase further during  
3 IBD <sup>42</sup>.

4 We identified serum antibodies from transgenic DC-LMP1/CD40 animals being  
5 bacteria-specific and recognizing a 60 kDa protein from *Hh*. The fact that only the 60  
6 kDa chaperonin from *Hh* was identified with this method was surprising, but heat shock  
7 proteins have been reported as immunodominant antigens, inducing humoral and  
8 cellular immune responses to several diseases in humans and mice. For instance,  
9  $\alpha$ Hsp60 antibodies are found in patients with tuberculosis and in mice infected with  
10 *Mycobacterium tuberculosis* <sup>46, 47</sup>. Pathogen-derived 60 kDa chaperonin induces pro-  
11 inflammatory cytokines *in vitro* <sup>48</sup> and mice infected with *Yersinia enterocolitica* produce  
12 60 kDa chaperonin-specific T cells involved in anti-pathogenic immune response <sup>46</sup>.

13 Serum antibodies specific for *H. pylori* Hsp60 were also reported in patients with gastric  
14 cancer <sup>49</sup>. Our data suggest that *Hh* is involved in disease development and its 60 kDa  
15 chaperonin might be an immunodominant antigen in the CD40-mediated colitis model.

16 *Hh* is known as pathobiont, endemic in many mouse colonies <sup>15, 16</sup> where it can elicit  
17 intestinal inflammation in immunodeficient or immunocompromized mice. This mimicks  
18 human IBD as demonstrated by several mouse models where it elicits spontaneous  
19 colitis <sup>19, 20, 21, 23, 50</sup>. Although all of our conventionally-housed mice were tested positive  
20 for the *Helicobacter* genus, only control mice remained consistently positive for *Hh*. In  
21 contrast, young DC-LMP1/CD40 mice showed already reduced prevalence while *Hh*  
22 was hardly detectable in older DC-LMP1/CD40 mice. One reason for this phenomenon  
23 might be the clearance of *Hh*, eventually as a consequence of increased anti-*Hh* serum  
24 IgG and IgA levels. Alternatively, *Hh* may be simply displaced for example by  
25 *Enterobacteriaceae* which bloom <sup>39, 40</sup> during inflammation in DC-LMP1/CD40 animals.

1 This may suggest that *Hh* is causing disease initiation but not its maintenance and  
2 progression.

3 In contrast, *Hh*-free DC-LMP1/CD40 mice only developed mild intestinal inflammation  
4 at the age of 5 to 6 months, when *Hh*-positive transgenic animals had already died  
5 from the disease. Interestingly, also IL-10-deficient mice developed intestinal  
6 inflammation with delayed onset and less severity in 5- to 6-month-old animals when  
7 maintained under SPF conditions <sup>21</sup>. Also, *Hh*-free transgenic mice with Treg-specific  
8 c-Maf deficiency developed mild spontaneous colitis at a later age of 6 to 12 month <sup>50</sup>.

9 The protection from early disease onset in *Hh*-free DC-LMP1/CD40 mice suggests that  
10 *Hh* might be a very potent disease driver. Nevertheless, although we could not find any  
11 evidence for specific commensals involved in disease initiation in aged *Hh*-free SPF-  
12 housed transgenic mice, also other bacteria may cause disease, although much  
13 weaker, with later onset and in less mice.

14 While we determined *Hh* as disease driver in CD40-mediated colitis model, this  
15 microbe did not have a direct impact, neither on DC nor on Treg differentiation in the  
16 colon LP, as CD103<sup>+</sup> DCs and ROR $\gamma$ t<sup>+</sup>Helios<sup>-</sup> iTregs were similarly reduced in both,  
17 *Hh*-free and *Hh*-infected DC-LMP1/CD40 animals <sup>24</sup>. In contrast, CD4<sup>+</sup> effector T cell  
18 differentiation in the colon LP was affected by *Hh*, which significantly increased IL-  
19 17<sup>+</sup>IFN- $\gamma$ <sup>+</sup> Th17/Th1 and IFN- $\gamma$ <sup>+</sup> Th1 cells. Also in IL-10<sup>-/-</sup> mice *Hh*-infection induced  
20 pathogenic, *Hh*-specific IL-17<sup>+</sup>IFN- $\gamma$ <sup>+</sup> Th17/Th1 cells <sup>51</sup>, probably due to the inability of  
21 Tregs to restrain colitogenic Th17 cells in *Hh*-positive IL-10<sup>-/-</sup> mice <sup>50</sup>.

22 Our data revealed that the intestinal microbiota is able to modulate the host immune  
23 response with impact on disease onset, progression and severity. Here, we identified  
24 *Hh* as disease driver in the DC-LMP1/CD40 colitis model. In the context of constitutive  
25 CD40-signaling in DCs, we could show that *Hh* induces early onset of fatal colitis, by  
26 causing the transdifferentiation of non-pathogenic Th17 cells into pathogenic Th1 cells

1 in the colonic LP. Our results are also of relevance for other studies using  
2 conventionally-housed mice as *Hh* is endemic in many mouse colonies. Our data  
3 further confirm the important role of the gut microbial composition during health and  
4 disease and reveal that single bacterial species can dramatically affect host immunity.  
5 The identification of other potential disease driving bacteria as well as specific bacterial  
6 antigens and underlying mechanisms in IBD is central. This further contributes to  
7 understanding the complex interaction of microbiota and host immune cells to develop  
8 and improve in particular personalized therapeutic strategies in IBD.

## 1 **Material and Methods**

2

3 **Mice.** DC-LMP1/CD40 mice were generated as previously described <sup>24</sup>. Briefly,  
4 CD11cCre mice <sup>52</sup> were crossed with LMP1/CD40<sup>fl/flSTOP</sup> <sup>53</sup> animals to obtain DC-  
5 LMP1/CD40 mice with constitutive CD11c-specific CD40-signalling.

6 Mice were analyzed in sex- and age-matched groups of 8 - 25 weeks of age, unless  
7 otherwise stated. Littermate animals were used as controls in a non-randomized, non-  
8 blinded fashion. Animal experiment permissions were granted by the animal ethics  
9 committee Regierung von Oberbayern, Munich, Germany (55.2.1.54-2532-22-2017).

10 Mice were bred and maintained under conventional conditions at the animal facility of  
11 the Institute for Immunology, Ludwig-Maximilians-Universität München. After embryo  
12 transfer rederivation performed by ENVIGO (Huntingdon, United Kingdom), all mice  
13 were kept under specified pathogen-free conditions (tested quarterly according to  
14 FELASA-14 recommendations) and housed in groups of 2-3 animals in IVCs  
15 (Tecniplast, Germany) at a 12h/12h light/dark cycle. Mice had free access to water  
16 (acidified and desalinated) and standard rodent chow (Altromin, 1310M).

17

18 **Single-cell preparation.** Single-cell suspensions of lymph nodes were prepared by  
19 mashing organs through a 100 µm cell strainer. Samples were washed with PBS and  
20 stored on ice for further analysis. Number of living cells was determined using the  
21 CASY Counter (OMNI Life Science). Cells from the colonic LP were isolated as  
22 previously described <sup>24</sup>. Briefly, the colon was removed, cleaned from fecal content,  
23 opened longitudinally, cut into pieces and predigested in Hank's balanced salt solution  
24 (HBSS) supplemented with 10 mM HEPES and 10 mM EDTA for 10 min on a shaker  
25 at 37 °C. Pieces were further digested for 30 min and then twice for 20 min with a  
26 mixture of Collagenase IV (157 Wuensch units ml<sup>-1</sup>, Worthington), DNase I (0.2 mg ml<sup>-1</sup>

1 <sup>1</sup> dissolved in PBS) and Liberase (0.65 Wuensch units ml<sup>-1</sup>, both Roche, dissolved in  
2 HBSS supplemented with 8 % FCS). Lymphocytes were purified with a 40/80 Percoll  
3 gradient and the number of living cells was determined using the CASY Counter.

4

5 **Flow cytometry analysis.** Where possible, 2 × 10<sup>6</sup> cells were stained with titred  
6 antibodies in PBS containing 2 % FCS and 0.01 % NaN<sub>3</sub> (FACS buffer) for 20 min at  
7 4 °C in the dark. Cells were washed once and used for direct acquisition on BD  
8 FACSCanto or fixed using 2 % paraformaldehyde in FACS buffer and measured the  
9 next day. Dead cells were excluded using Zombie Aqua Fixable Viability Kit  
10 (BioLegend, Cat: 423102). For intracellular cytokine stainings, cells were fixed and  
11 permeabilized for 30 min at 4 °C in the dark after extracellular stainings using BD  
12 Cytofix/Cytoperm (Fixation and Permeabilization Solution, BD Biosciences, Cat: 51-  
13 2090KZ) according to manufacturer's instructions. Cells were washed and stained with  
14 indicated antibodies in 50 µl BD Perm/Wash (Buffer, BD Biosciences, Cat: 51-2091KZ)  
15 for 30 min at 4 °C in the dark. For transcription factor staining, cells were fixed and  
16 permeabilized after extracellular stainings in 1x Fixation/Permeabilization solution  
17 (eBioscience, Cat: 00-5523-00) for 30 min at 4 °C in the dark according to  
18 manufacturer's instructions. Cells were washed twice with 1x Permeabilization Buffer  
19 (eBioscience, Cat: 00-5523-00) and stained with the indicated antibodies in 50 µl 1x  
20 Permeabilization Buffer for 30 min at 4 °C in the dark. Afterwards, cells were washed  
21 once and acquired on BD FACSCanto.

22 The following antibodies were used: FoxP3 (FJK-16s; eFlour660, dil. 1:50), Helios  
23 (22F6; FITC, dil. 1:400), ROR $\gamma$ t (AFKJS-9; PE, dil. 1:100) (eBioscience); CD25 (PC61;  
24 PerCP, dil. 1:400), CD103 (M290; PE, dil. 1:150) (BD Pharmingen); CD11b (M1/70;  
25 APC-eFluor780, dil. 1:400) (Invitrogen); CD3 (17A2; AlexaFluor488, dil. 1:400; Pe-  
26 Cy7, dil. 1:400), CD4 (RM4-5; PerCP, 1:800; GK1.5; APC-Cy7, dil. 1:400), CD11c



1 (N418; Pe-Cy7, dil. 1:400), CD45 (30-F11; BV421, dil. 1:400), CD64 (X54-5/7.1; APC,  
2 dil. 1:200), IL-17A (TC11-18H10.1; PE, dil. 1:200), IFN- $\gamma$  (XMG1.2; APC, dil. 1:400),  
3 MHC class II (I-A/I-E) (M5/114.15.2; FITC, PerCP, dil. 1:800) (BioLegend). Data  
4 analysis was performed using FlowJo version 10 (TreeStar, Ashland, OR, USA).

5

6 **Ex vivo T cell restimulation.**  $2 \times 10^6$  cells were stimulated for 4 h at 23°C with 40 ng  
7 ml<sup>-1</sup> PMA and 1  $\mu$ g ml<sup>-1</sup> ionomycin in the presence of 2  $\mu$ M Monensin (Golgi-Stop, BD  
8 Biosciences, Cat: 51-2092KZ). Cells were washed twice with FACS buffer and stained  
9 for extracellular markers, fixed/permeabilized and stained for intracellular markers as  
10 described above.

11

12 **ELISA for fecal lipocalin-2.** Fecal samples were reconstituted in PBS containing 0.1  
13 % Tween 20 (100 mg ml<sup>-1</sup>) and vortexed for 20 min for homogenisation. Upon  
14 centrifugation for 15 min at 100 x g at 4 °C, supernatants were centrifuged again for 10  
15 min at 10,000 x g at 4 °C. The supernatants were analyzed for lipocalin-2 content using  
16 Quantikine ELISA kit for mouse Lipocalin-2/NGAL (R&D Systems, Cat: MLCN20).

17

18 **Determination of serum antibody concentrations.** Blood from mice was collected  
19 by terminal cardiac puncture and transferred into a Microtainer tube (BD Biosciences,  
20 Cat: 365963). After incubation at room temperature for at least 3 h, the coagulated  
21 blood was centrifuged at 8000 rpm for 5 min at 21 °C and serum was frozen at -20°C  
22 until use. Serum antibody concentrations were determined using Mouse IgG total  
23 Ready-SET-Go! or Mouse IgA Ready-SET-Go! ELISA (eBioscience, Cat: 88-50400  
24 and 88-50450), according to manufacturer's instructions.

25

1 **Immunoprecipitation of bacterial antigens.** Identification of bacterial antigens within  
2 the cecal bacterial lysate (CBL) was performed by using serum antibodies from control  
3 and DC-LMP1/CD40 mice for immunoprecipitation followed by Mass Spectrometry.  
4 Therefore, 50  $\mu$ l protein G beads (Dynabeads Protein G, Invitrogen, Cat: 10004D) were  
5 coupled with 2.5  $\mu$ g serum IgG from Ctr or DC-LMP1/CD40 mice for 10 min at room  
6 temperature. 1600  $\mu$ g CBL was added to the coated beads for 30 min at room  
7 temperature and the complex was washed three times with PBS/Tween 0.02 %  
8 followed by additional 3 rounds of washing with 50 mM  $\text{NH}_4\text{HCO}_3$ . Samples were  
9 stored at  $-20^\circ\text{C}$  until LC-MS/MS was performed by the Protein Analysis Unit  
10 (Biomedical Center, LMU Munich).

11  
12 **On-beads trypsin digest and Mass Spectrometry.** Following the  
13 immunoprecipitation procedure described above, beads were incubated with 100  $\mu$ l of  
14 a 10 ng  $\mu\text{l}^{-1}$  trypsin solution in 1 M Urea and 50 mM  $\text{NH}_4\text{HCO}_3$  for 30 min at  $25^\circ\text{C}$  for  
15 trypsin digestion. The supernatant was collected, beads washed twice with 50  
16 mM  $\text{NH}_4\text{HCO}_3$  and all three supernatants collected together and incubated overnight  
17 at  $25^\circ\text{C}$  at 800 rpm after addition of dithiothreitol to 1 mM. Iodoacetamide was added  
18 to a final concentration of 27 mM and samples were incubated at  $25^\circ\text{C}$  for 30 min in  
19 the dark. 1  $\mu$ l of 1 M dithiothreitol was added to the samples and incubated for 10 min  
20 to quench the iodoacetamide. Finally, 2.5  $\mu$ l of trifluoroacetic acid was added and the  
21 samples were subsequently desalted using C18 Stage tips. Samples were evaporated  
22 to dryness, resuspended in 15  $\mu$ l of 0.1 % formic acid solution and injected in an  
23 Ultimate 3000 RSLCnano system (Thermo), separated in a 15-cm analytical column  
24 (75  $\mu$ m ID home-packed with ReproSil-Pur C18-AQ 2.4  $\mu$ m from Dr. Maisch) with a 50  
25 min gradient from 5 to 60 % acetonitrile in 0.1 % formic acid. The effluent from the  
26 HPLC was directly electrosprayed into a Qexactive HF (Thermo) operated in data

1 dependent mode to automatically switch between full scan MS and MS/MS acquisition.  
2 Survey full scan MS spectra (from m/z 375 - 1600) were acquired with resolution R =  
3 60,000 at m/z 400 (AGC target of  $3 \times 10^6$ ). The 10 most intense peptide ions with  
4 charge states between 2 and 5 were sequentially isolated to a target value of  $1 \times 10^5$ ,  
5 and fragmented at 27 % normalized collision energy. Typical mass spectrometric  
6 conditions were: spray voltage, 1.5 kV; no sheath and auxiliary gas flow; heated  
7 capillary temperature, 250°C; ion selection threshold, 33,000 counts. MaxQuant  
8 1.5.2.8 was used to identify proteins and quantify by intensity-based absolute  
9 quantification (iBAQ) with the following parameters: Database,  
10 uniprot\_proteomes\_Bacteria\_151113.fasta; MS tol, 10 ppm; MS/MS tol, 10 ppm;  
11 Peptide FDR, 0.1; Protein FDR, 0.01 Min. peptide Length, 5; Variable modifications,  
12 Oxidation (M); Fixed modifications, Carbamidomethyl (C); Peptides for protein  
13 quantitation, razor and unique; Min. peptides, 1; Min. ratio count, 2. Identified proteins  
14 were considered as interaction partners if their MaxQuant iBAQ values were greater  
15 than log<sub>2</sub> 2-fold enrichment and p-value 0.05 (ANOVA) when compared to the control.  
16 The mass spectrometry proteomics data have been deposited to the  
17 ProteomeXchange Consortium via the PRIDE (<http://www.proteomexchange.org>)  
18 partner repository with the dataset identifier PXD018025.

19

20 **Culture and lysate preparation of *Hh*.** The *Helicobacter hepaticus* strain *Hh*-2 (ATCC  
21 51448)<sup>54</sup> was purchased from the Leibniz Institute DSMZ - German Collection of  
22 Microorganisms and Cell Cultures (DSM No.22909) and cultivated at the Max von  
23 Pettenkofer-Institute, LMU Munich. Bacteria from cryo stock were resuspended in  
24 Brain Heart Infusion (BHI) medium and put onto blood agar plates (Columbia agar with  
25 5 % sheep blood, BD, Cat: 4354005). Plates were incubated in a chamber with  
26 anaerobic conditions (83 % N<sub>2</sub>, 10 % CO<sub>2</sub>, 7 % H<sub>2</sub>) for 4 days at 37 °C. A subculture

1 was cultivated further on in BHI medium with 3 % sheep serum in a culture flask in the  
2 chamber with anaerobic conditions for additional 4 days at 37 °C.  
3 For *Hh* lysate (*HhL*) preparation, bacterial cells were harvested and washed 2 - 3 times  
4 with PBS. Cell pellets were resuspended in PBS and lyzed by sonification with the  
5 Sonifier 150 Cell Disruptor (Branson) 6 times for 3 min at level 3 on ice. Lyzed cells  
6 were centrifuged at 20,000 x g for 30 min at 4°C and the supernatant was mixed with  
7 protease inhibitor (cOmplete ULTRA Tablets, Roche, Sigma-Aldrich, Cat:  
8 05892953001). Protein concentration was determined using the Qubit Protein Assay  
9 Kit and Fluorometer (Invitrogen), according to the manufacturer's instructions and the  
10 lysate was stored at -20 °C until use for immunoblot or ELISA.

11  
12 **ELISA for commensal- or *Hh*-specific antibodies.** This assay was performed as  
13 previously described <sup>24</sup> with the following modifications. The CBL was diluted in  
14 carbonate buffer to a final concentration of 1 µg ml<sup>-1</sup>. *HhL* was prepared as described  
15 above and diluted in carbonate buffer to a final concentration of 0.1 µg ml<sup>-1</sup>.  
16 Differences in serum antibody concentrations between Ctr and DC-LMP1/CD40 mice  
17 were adjusted by using 2.5 µg ml<sup>-1</sup> serum IgG or 6.5 µg ml<sup>-1</sup> serum IgA for all samples.

18  
19 **Immunoblotting for commensal- or *Hh*-specific antibodies.** Serum IgG or IgA  
20 reactivity towards CBL or *HhL* was analyzed by immunoblot analysis. 30 µg CBL or 20  
21 µg *HhL* were separated by SDS-PAGE and transferred to a nitrocellulose membrane.  
22 Sera of mice were used as primary antibodies. Differences in serum antibody  
23 concentrations between Ctr and DC-LMP1/CD40 mice were adjusted by using 2.5 µg  
24 ml<sup>-1</sup> serum IgG or 1 µg ml<sup>-1</sup> serum IgA for all samples. In some experiments, mouse  
25 IgG1 anti-human heat shock protein 60 (αHSP60) antibody (clone LK-2, Enzo) was  
26 additionally used as primary antibody (1:10,000 in PBS/1 % nonfat dried milk). HRP-

1 conjugated secondary antibodies were used as follows: goat anti-mouse IgG-HRP  
2 (SouthernBiotech, Cat: 1030-05; 1:10,000) or goat anti-mouse IgA-HRP  
3 (SouthernBiotech, Cat: 1040-05; 1:10,000). Western Lightning Plus-ECL Detection  
4 Reagent (PerkinElmer) and X-ray films (Amersham) were used for protein detection.

5

## 6 **Bacteria screening PCR**

7 Mice were screened for bacterial colonization by PCR using the 16S rRNA gene as  
8 target. Genomic DNA was isolated from fecal pellets with the QIAamp Fast DNA Stool  
9 Mini Kit (Qiagen), according to manufacturer's instructions. 5 - 10 ng DNA was used  
10 for amplification with MyTaq Polymerase (Bioline). The PCR cycling conditions were  
11 as follows: denaturation at 94°C for 1 min, annealing for bacteria at 58°C, for *Hspp* and  
12 *Hh* at 61°C and for *Ht*, *Hr* and *Hb* at 55°C for 1 min, elongation at 72°C for 1 min (35  
13 cycles) and final elongation at 72°C for 7 min.

14 The following primer sets were used:

15 bacteria (forward primer: 5'-TCCTACGGGAGGCAGCAGT-3', reverse primer: 5'-  
16 GGACTACCAGGGTATCTAATCCTGTT-3', 467 bp)<sup>55</sup>; *Hspp* (forward primer: 5'-  
17 TATGACGGGTATCCGGC-3', reverse primer: 5'-ATTCCACCTACCTCTCCCA-3',  
18 375 bp)<sup>56</sup>; *Hh* (forward primer: 5'-GCATTTGAAACTGTTACTCTG-3', reverse primer:  
19 5'-CTGTTTTCAAGCTCC- CC-3', 417 bp)<sup>15</sup>; *Ht* (forward primer: 5'-TTAAA-  
20 GATATTCTAGGGGTATAT-3', reverse primer: 5'-TCTCCCATCTCTAGAGTGA-3',  
21 455 bp)<sup>57</sup>; *Hr* (forward primer: 5'-GTCCTTAGTTGCTAACTATT-3', reverse primer: 5'-  
22 AGATTTGCTCCATTTACAAA-3', 166 bp)<sup>58</sup>; *Hb* (forward primer: 5'-  
23 AGAACTGCATTTGAACTACTTT-3', reverse primer: 5'-  
24 GGTATTGCATCTCTTTGTATGT-3', 638 bp)<sup>59</sup>.

25

1 **16S rRNA gene amplicon sequencing and taxonomic profiling.** Microbiome  
2 analysis was done from whole DNA extracted from mouse fecal samples and is based  
3 on sequencing the V3-V4 variable regions of the 16S rRNA gene as previously  
4 described <sup>24</sup>. Amplicons were analysed with mothur v. 1.43.0. (Schloss et al  
5 75(23):7537-41) to remove chimeric sequences with the "chimera.vsearch"-command  
6 (default settings). Sequences were further processed using Qiime2 version 2020.2  
7 Taxonomic assignment was performed with classify sklearn using a classifier trained  
8 on SILVA database (Qiime version 132 99 % 16S). Differential abundance was  
9 estimated using the ANCOM function <sup>60</sup> after collapsing to taxonomic level five and  
10 adding pseudo counts. 16S rRNA amplicon sequencing data have been deposited in  
11 the NCBI Sequence Read Archive under Accession Number SRX1799186.

12

13 **Colonization with *Hh* by oral gavage.** Bacterial suspensions cultured as described  
14 above were used for oral inoculation to mice. *Hh* identity was confirmed by 16S RNA  
15 gene sequencing. Bacterial density was determined by OD measurements at 600 nm.  
16 Appropriate amount of suspension was washed with PBS and then adjusted to OD  
17 (600) = 3.0. 8-week-old mice were kept under specific and opportunistic pathogen free  
18 conditions for the time of the experiment and inoculated with 100 µl of the suspension  
19 by oral gavage at day 0, 3 and 5, for a total of 3 doses. Animals were analyzed 40 days  
20 post inoculation.

21

22 **Statistics.** For absolute cell numbers, the percentage of living cells of a certain subset  
23 was multiplied by the number of living cells as determined by CASY Counter. Unless  
24 otherwise stated, significance was determined using unpaired Student's *t*-test and  
25 defined as follows: \*P<0.05, \*\*P<0.01, and \*\*\*P<0.001 and \*\*\*\*P<0.0001. Error bars  
26 represent mean ± SEM.

1

2

## 1 **References**

- 2 1. Sekirov I, Russell SL, Antunes LC, Finlay BB. Gut microbiota in health and  
3 disease. *Physiol Rev* 90, 859-904 (2010).  
4
- 5 2. Kamada N, Seo SU, Chen GY, Nunez G. Role of the gut microbiota in immunity  
6 and inflammatory disease. *Nat Rev Immunol* 13, 321-335 (2013).  
7
- 8 3. Littman DR, Pamer EG. Role of the commensal microbiota in normal and  
9 pathogenic host immune responses. *Cell Host Microbe* 10, 311-323 (2011).  
10
- 11 4. Maynard CL, Elson CO, Hatton RD, Weaver CT. Reciprocal interactions of the  
12 intestinal microbiota and immune system. *Nature* 489, 231-241 (2012).  
13
- 14 5. Takahashi K, et al. Reduced Abundance of Butyrate-Producing Bacteria  
15 Species in the Fecal Microbial Community in Crohn's Disease. *Digestion* 93, 59-65  
16 (2016).  
17
- 18 6. Seksik P, et al. Alterations of the dominant faecal bacterial groups in patients  
19 with Crohn's disease of the colon. *Gut* 52, 237-242 (2003).  
20
- 21 7. Manichanh C, et al. Reduced diversity of faecal microbiota in Crohn's disease  
22 revealed by a metagenomic approach. *Gut* 55, 205-211 (2006).  
23
- 24 8. Ni J, Wu GD, Albenberg L, Tomov VT. Gut microbiota and IBD: causation or  
25 correlation? *Nat Rev Gastroenterol Hepatol* 14, 573-584 (2017).  
26
- 27 9. Ivanov, II, et al. Induction of intestinal Th17 cells by segmented filamentous  
28 bacteria. *Cell* 139, 485-498 (2009).  
29
- 30 10. Ivanov, II, et al. Specific microbiota direct the differentiation of IL-17-producing  
31 T-helper cells in the mucosa of the small intestine. *Cell Host Microbe* 4, 337-349  
32 (2008).  
33



- 1 11. Atarashi K, et al. Induction of colonic regulatory T cells by indigenous  
2 Clostridium species. *Science* 331, 337-341 (2011).
- 3
- 4 12. Round JL, Mazmanian SK. Inducible Foxp3+ regulatory T-cell development by  
5 a commensal bacterium of the intestinal microbiota. *Proc Natl Acad Sci U S A* 107,  
6 12204-12209 (2010).
- 7
- 8 13. Wexler HM. Bacteroides: the good, the bad, and the nitty-gritty. *Clin Microbiol*  
9 *Rev* 20, 593-621 (2007).
- 10
- 11 14. Swidsinski A, Weber J, Loening-Baucke V, Hale LP, Lochs H. Spatial  
12 organization and composition of the mucosal flora in patients with inflammatory bowel  
13 disease. *J Clin Microbiol* 43, 3380-3389 (2005).
- 14
- 15 15. Shames B, Fox JG, Dewhirst F, Yan L, Shen Z, Taylor NS. Identification of  
16 widespread *Helicobacter hepaticus* infection in feces in commercial mouse colonies by  
17 culture and PCR assay. *J Clin Microbiol* 33, 2968-2972 (1995).
- 18
- 19 16. Taylor NS, Xu S, Nambiar P, Dewhirst FE, Fox JG. Enterohepatic *Helicobacter*  
20 species are prevalent in mice from commercial and academic institutions in Asia,  
21 Europe, and North America. *J Clin Microbiol* 45, 2166-2172 (2007).
- 22
- 23 17. Fox JG, et al. Chronic proliferative hepatitis in A/JCr mice associated with  
24 persistent *Helicobacter hepaticus* infection: a model of helicobacter-induced  
25 carcinogenesis. *Infect Immun* 64, 1548-1558 (1996).
- 26
- 27 18. Ihrig M, Schrenzel MD, Fox JG. Differential susceptibility to hepatic  
28 inflammation and proliferation in AXB recombinant inbred mice chronically infected  
29 with *Helicobacter hepaticus*. *Am J Pathol* 155, 571-582 (1999).
- 30
- 31 19. Cahill RJ, Foltz CJ, Fox JG, Dangler CA, Powrie F, Schauer DB. Inflammatory  
32 bowel disease: an immunity-mediated condition triggered by bacterial infection with  
33 *Helicobacter hepaticus*. *Infect Immun* 65, 3126-3131 (1997).
- 34

- 1 20. Erdman SE, et al. CD4+ CD25+ regulatory T lymphocytes inhibit microbially  
2 induced colon cancer in Rag2-deficient mice. *Am J Pathol* 162, 691-702 (2003).  
3
- 4 21. Kullberg MC, et al. *Helicobacter hepaticus* triggers colitis in specific-pathogen-  
5 free interleukin-10 (IL-10)-deficient mice through an IL-12- and gamma interferon-  
6 dependent mechanism. *Infect Immun* 66, 5157-5166 (1998).  
7
- 8 22. Chin EY, Dangler CA, Fox JG, Schauer DB. *Helicobacter hepaticus* infection  
9 triggers inflammatory bowel disease in T cell receptor alphabeta mutant mice. *Comp*  
10 *Med* 50, 586-594 (2000).  
11
- 12 23. Burich A, et al. *Helicobacter*-induced inflammatory bowel disease in IL-10- and  
13 T cell-deficient mice. *Am J Physiol Gastrointest Liver Physiol* 281, G764-778 (2001).  
14
- 15 24. Barthels C, et al. CD40-signalling abrogates induction of RORgammat(+) Treg  
16 cells by intestinal CD103(+) DCs and causes fatal colitis. *Nat Commun* 8, 14715  
17 (2017).  
18
- 19 25. Ogrinc Wagner A, et al. Strain specific maturation of Dendritic cells and  
20 production of IL-1beta controls CD40-driven colitis. *PLoS One* 14, e0210998 (2019).  
21
- 22 26. Kusters P, et al. Constitutive CD40 Signaling in Dendritic Cells Limits  
23 Atherosclerosis by Provoking Inflammatory Bowel Disease and Ensuing Cholesterol  
24 Malabsorption. *Am J Pathol* 187, 2912-2919 (2017).  
25
- 26 27. Gonsky R, Deem RL, C.J. L, Haritunians T, Yang S, Targan SR. IFNG  
27 rs1861494 polymorphism is associated with IBD disease severity and functional  
28 changes in both IFNG methylation and protein secretion. *Inflamm Bowel Dis* 20, 1794-  
29 1801 (2014).  
30
- 31 28. Danese S, et al. Activated platelets are the source of elevated levels of soluble  
32 CD40 ligand in the circulation of inflammatory bowel disease patients. *Gut* 52, 1435-  
33 1441 (2003).  
34

- 1 29. Liu Z, et al. Hyperexpression of CD40 ligand (CD154) in inflammatory bowel  
2 disease and its contribution to pathogenic cytokine production. *J Immunol* 163, 4049-  
3 4057 (1999).  
4
- 5 30. Ludwiczek O, Kaser A, Tilg H. Plasma levels of soluble CD40 ligand are  
6 elevated in inflammatory bowel diseases. *Int J Colorectal Dis* 18, 142-147 (2003).  
7
- 8 31. Danese S, Sans M, Fiocchi C. The CD40/CD40L costimulatory pathway in  
9 inflammatory bowel disease. *Gut* 53, 1035-1043 (2004).  
10
- 11 32. Hart AL, et al. Characteristics of intestinal dendritic cells in inflammatory bowel  
12 diseases. *Gastroenterology* 129, 50-65 (2005).  
13
- 14 33. Kasran A, et al. Safety and tolerability of antagonist anti-human CD40 Mab  
15 ch5D12 in patients with moderate to severe Crohn's disease. *Aliment Pharmacol Ther*  
16 22, 111-122 (2005).  
17
- 18 34. Chassaing B, Srinivasan G, Delgado MA, Young AN, Gewirtz AT, Vijay-Kumar  
19 M. Fecal lipocalin 2, a sensitive and broadly dynamic non-invasive biomarker for  
20 intestinal inflammation. *PLoS One* 7, e44328 (2012).  
21
- 22 35. Brandwein SL, et al. Spontaneously colitic C3H/HeJBir mice demonstrate  
23 selective antibody reactivity to antigens of the enteric bacterial flora. *J Immunol* 159,  
24 44-52 (1997).  
25
- 26 36. Suerbaum S, et al. The complete genome sequence of the carcinogenic  
27 bacterium *Helicobacter hepaticus*. *Proc Natl Acad Sci U S A* 100, 7901-7906 (2003).  
28
- 29 37. Boog CJ, et al. Two monoclonal antibodies generated against human hsp60  
30 show reactivity with synovial membranes of patients with juvenile chronic arthritis. *J*  
31 *Exp Med* 175, 1805-1810 (1992).  
32
- 33 38. Barthels C, et al. CD40-signalling abrogates induction of ROR $\gamma$ <sup>+</sup> Treg cells  
34 by intestinal CD103 DCs and causes fatal colitis. *Nat Commun* 8, 14715 (2017).

- 1  
2 39. Lupp C, et al. Host-mediated inflammation disrupts the intestinal microbiota and  
3 promotes the overgrowth of Enterobacteriaceae. *Cell Host Microbe* 2, 119-129 (2007).  
4  
5 40. Stecher B, et al. *Salmonella enterica* serovar typhimurium exploits inflammation  
6 to compete with the intestinal microbiota. *PLoS Biol* 5, 2177-2189 (2007).  
7  
8 41. Konrad A, Cong Y, Duck W, Borlaza R, Elson CO. Tight mucosal  
9 compartmentation of the murine immune response to antigens of the enteric  
10 microbiota. *Gastroenterology* 130, 2050-2059 (2006).  
11  
12 42. Zimmermann K, Haas A, Oxenius A. Systemic antibody responses to gut  
13 microbes in health and disease. *Gut Microbes* 3, 42-47 (2012).  
14  
15 43. Wilmore JR, et al. Commensal Microbes Induce Serum IgA Responses that  
16 Protect against Polymicrobial Sepsis. *Cell Host Microbe* 23, 302-311 e303 (2018).  
17  
18 44. Furrie E, Macfarlane S, Cummings JH, Macfarlane GT. Systemic antibodies  
19 towards mucosal bacteria in ulcerative colitis and Crohn's disease differentially activate  
20 the innate immune response. *Gut* 53, 91-98 (2004).  
21  
22 45. Dotan I. New serologic markers for inflammatory bowel disease diagnosis. *Dig*  
23 *Dis* 28, 418-423 (2010).  
24  
25 46. Noll A, Autenrieth IB. Immunity against *Yersinia enterocolitica* by vaccination  
26 with *Yersinia* HSP60 immunostimulating complexes or *Yersinia* HSP60 plus  
27 interleukin-12. *Infect Immun* 64, 2955-2961 (1996).  
28  
29 47. Young D, Lathigra R, Hendrix R, Sweetser D, Young RA. Stress proteins are  
30 immune targets in leprosy and tuberculosis. *Proc Natl Acad Sci U S A* 85, 4267-4270  
31 (1988).  
32

- 1 48. Bulut Y, et al. Mycobacterium tuberculosis heat shock proteins use diverse Toll-  
2 like receptor pathways to activate pro-inflammatory signals. J Biol Chem 280, 20961-  
3 20967 (2005).  
4
- 5 49. Tanaka A, et al. Helicobacter pylori heat shock protein 60 antibodies are  
6 associated with gastric cancer. Pathol Res Pract 205, 690-694 (2009).  
7
- 8 50. Xu M, et al. c-MAF-dependent regulatory T cells mediate immunological  
9 tolerance to a gut pathobiont. Nature 554, 373-377 (2018).  
10
- 11 51. Kullberg MC, et al. IL-23 plays a key role in Helicobacter hepaticus-induced T  
12 cell-dependent colitis. J Exp Med 203, 2485-2494 (2006).  
13
- 14 52. Caton ML, Smith-Raska MR, Reizis B. Notch-RBP-J signaling controls the  
15 homeostasis of CD8<sup>+</sup> dendritic cells in the spleen. J Exp Med 204, 1653-1664 (2007).  
16
- 17 53. Homig-Holzel C, et al. Constitutive CD40 signaling in B cells selectively  
18 activates the noncanonical NF- $\kappa$ B pathway and promotes lymphomagenesis. J  
19 Exp Med 205, 1317-1329 (2008).  
20
- 21 54. Fox JG, et al. Helicobacter hepaticus sp. nov., a microaerophilic bacterium  
22 isolated from livers and intestinal mucosal scrapings from mice. J Clin Microbiol 32,  
23 1238-1245 (1994).  
24
- 25 55. Nagalingam NA, Robinson CJ, Bergin IL, Eaton KA, Huffnagle GB, Young VB.  
26 The effects of intestinal microbial community structure on disease manifestation in IL-  
27 10<sup>-/-</sup> mice infected with Helicobacter hepaticus. Microbiome 1, 15 (2013).  
28
- 29 56. Beckwith CS, Franklin CL, Hook RR, Jr., Besch-Williford CL, Riley LK. Fecal  
30 PCR assay for diagnosis of Helicobacter infection in laboratory rodents. J Clin  
31 Microbiol 35, 1620-1623 (1997).  
32
- 33 57. Franklin CL, et al. Helicobacter typhlonius sp. nov., a Novel Murine Urease-  
34 Negative Helicobacter Species. J Clin Microbiol 39, 3920-3926 (2001).

1

2 58. Shen Z, et al. *Helicobacter rodentium* sp. nov., a urease-negative *Helicobacter*  
3 species isolated from laboratory mice. *Int J Syst Bacteriol* 47, 627-634 (1997).

4

5 59. Fox JG, et al. *Helicobacter bilis* sp. nov., a novel *Helicobacter* species isolated  
6 from bile, livers, and intestines of aged, inbred mice. *J Clin Microbiol* 33, 445-454  
7 (1995).

8

9 60. Mandal S, Van Treuren W, White RA, Eggesbo M, Knight R, Peddada SD.  
10 Analysis of composition of microbiomes: a novel method for studying microbial  
11 composition. *Microb Ecol Health Dis* 26, 27663 (2015).

12

### 13 **Acknowledgements**

14 This work was supported by the Deutsche Forschungsgemeinschaft SFB1054 B03 to  
15 T.B. and A06 to A.K.; B.S., L.J. and D.R. were supported by the Center for  
16 Gastrointestinal Microbiome Research (CEGIMIR) of the German Center for Infection  
17 Research (DZIF). B.S. was supported by the DFG Priority Programme SPP1656 and  
18 the SFB1371. V.F. was supported by QBM, Munich.

19

### 20 **Author contributions**

21 V.F. conducted the experiments. T.S. conducted bioinformatic analyses. S.S., L.J. and  
22 B.S. analysed sequences, D.R. cultivated *Hh*, I.F. and A.I. performed proteome  
23 analyses, A.K. B.P. and D.M. planned and performed colonization experiments with  
24 *H.h.*, T.B. designed the experiments and V.F. and T.B. wrote the paper.

25
